# Supplementary material for: Synthesis and properties of novel donor-type metal–dithiolene complexes based on 5,6-dihydro-1,4-dioxine-2,3-dithiol (edo) ligand
Source: Royal Society of Chemistry journal article supplement (doi:10.1039/b102000p), 2001-01-01
Supplement: b102000p.doc [file b102000p.doc]

Conditions for the crystal growth

a Bun4N salts

| Metal Complex | Counter anion | Donor  / mg | supporting electrolytea  / mg | Solventb  / ml | Current  / mA | Time  / days | Shape | Donor : Anion |
| --- | --- | --- | --- | --- | --- | --- | --- | --- |
| Ni(edo)2 | ClO4- | 8.9 | 54.8 | CB / 20 | 0.50 | 14 | plate | 3:2 |
| FeCl4- | 9.6 | 53.5 | CB / 20 | 1.00 | 5 | block | 2:1 |
| GaCl4- | 8.4 | 53.6 | CB / 20 | 1.00 | 9 | block | 2:1 |
| FeBr4- | 8.3 | 50.8 | CB / 20 | 0.25 | 15 | block | 2:1 |
| PF6- | 9.5 | 51.3 | CB / 20 | 0.50 | 10 | plate | 3:2 |
| AsF6- | 8.7 | 53.2 | CB / 20 | 0.10 | 22 | needle | 2:1 |
| SbF6- | 8.6 | 53.5 | CB / 20 | 0.10 | 22 | plate | 3:2 |
| Ni(mnt)2- | 8.7 | 15.8 | CB / 20 | 0.25 | 21 | plate | Ni(edo)(mnt) c |
| Ni(dmit)2- | 8.3 | 16.4 | DCE / 20 | 0.25 | 36 | needle | Ni(dmit)(edo) c |
| Ni(dddt)(edo) | PF6- | 7.0 | 48.7 | CB / 20 | 1.00 | 10 | plate | 3:2 |
| AsF6- | 8.8 | 50.4 | CB / 20 | 0.50 | 33 | plate | 3:2 |
| SbF6- | 8.6 | 53.4 | CB / 20 | 0.50 | 19 | plate | 3:2 |
| FeCl4- | 8.2 | 49.9 | CB / 20 | 0.25 | 20 | block | 3:2 |
| FeBr4- | 8.6 | 53.1 | CB / 20 | 0.50 | 33 | block | 3:2 |
| Ni(ddds)(edo) | PF6- | 3.1 | 26.3 | CB / 10 | 0.25 | 10 | plate | 3:2 |
| FeCl4- | 3.4 | 26.7 | CB / 10 | 0.25 | 10 | plate | 2:1 |
| Ni(ddt)(edo) | BF4- | 4.5 | 24.8 | CB / 10 | 0.50 | 6 | plate | 2:1 |
| PF6- | 4.6 | 25.9 | CB / 10 | 0.50 | 19 | plate | 2:1 |
| FeCl4- | 4.3 | 25.0 | CB / 10 | 0.30 | 19 | plate | 2:1 |
| GaCl4- | 4.4 | 25.6 | CB / 10 | 0.25 | 16 | plate | 2:1 |
| Ni(edo)(pdt) | PF6- | 8.6 | 50.6 | CB / 20 | 0.50 | 21 | needle | 3:2 |
| ClO4- | 8.5 | 49.4 | CB / 20 | 0.50 | 21 | needle | 1:1 |
| FeCl4- | 8.9 | 49.7 | CB / 20 | 1.00 | 39 | needle | 1:1 |
| GaCl4- | 4.9 | 25.3 | CB / 10 | 0.50 | 18 | needle | 1:1 |
| Ni(dtm)(edo) | ClO4- | 6.2 | 37.0 | CB / 20 | 0.25 | 9 | needle | 2:1 |
| FeCl4- | 6.6 | 36.4 | CB / 20 | 0.25 | 9 | needle | 2:1 |

b CB=chlorobenzene, DCE=1,2-dichloroethane

c See text.
